# Supplementary material
Source: bioRxiv or medRxiv preprint supplement (http://biorxiv.org/highwire/filestream/13735/field_highwire_adjunct_files/0/043265-1.pdf)

setting  n/a  yap  fais

disease  dengue  zika  n/a

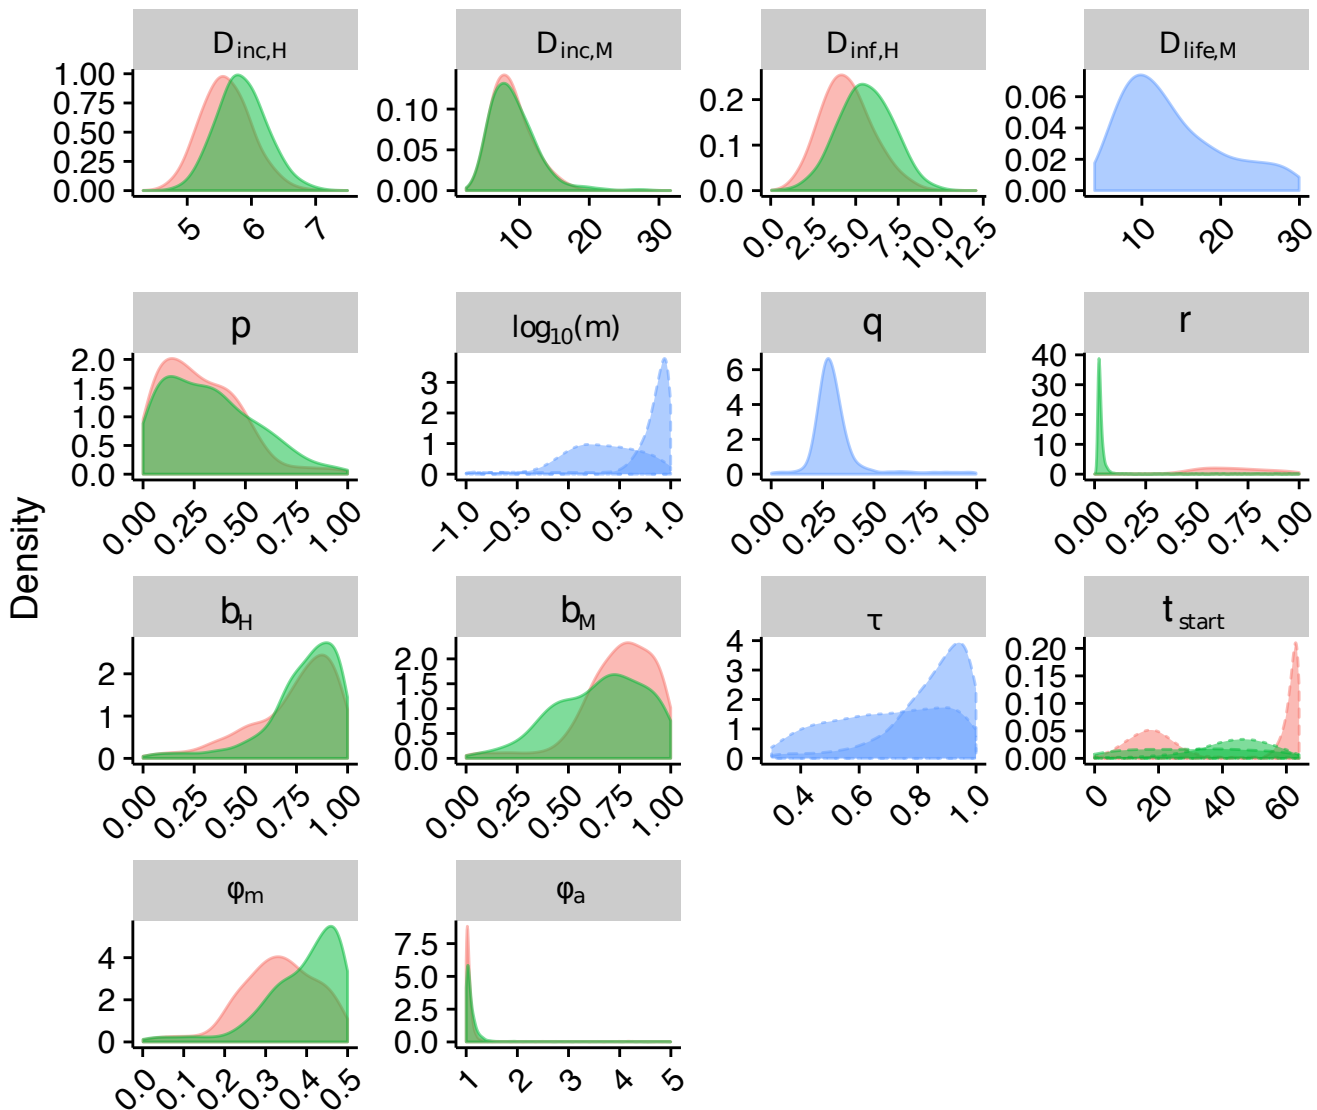

Supplement: Supplementary file [file 043265-1.pdf]
